# Supplementary material
Source: PubMed Central journal article supplement (PMC4699419)
Supplement: i1552-5783-56-13-8331-s01.pdf [file i1552-5783-56-13-8331-s01.pdf]

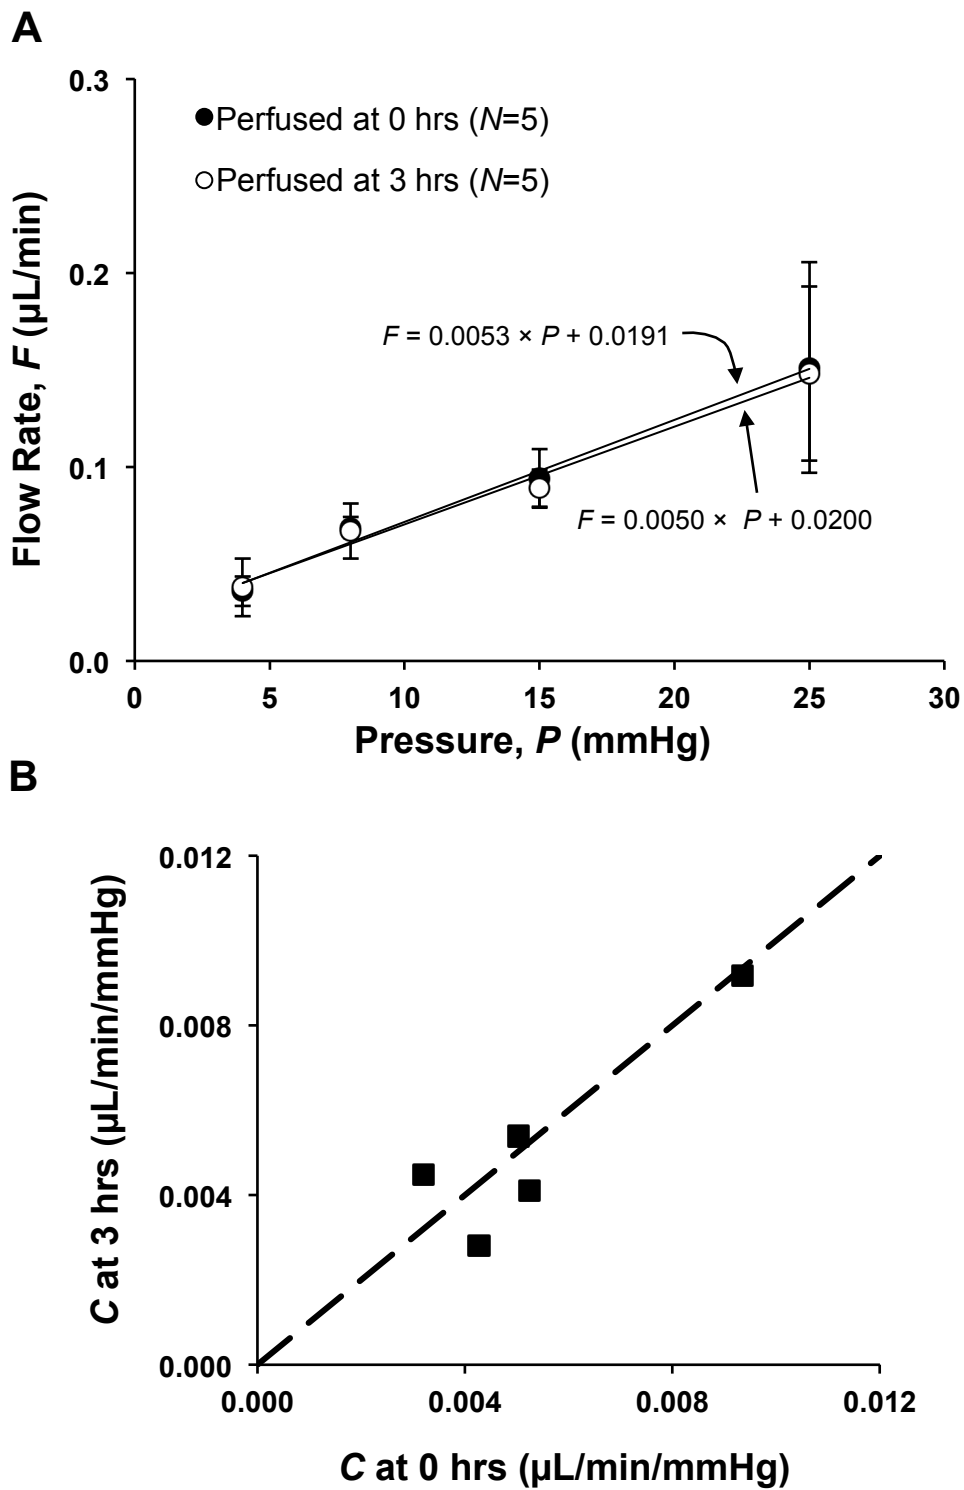

**Supplemental Figure 1:** Perfusion studies examining the effect of post-mortem time on the flow-pressure relationship (A) and outflow facility (B) in five additional pairs of eyes. Panel A: One eye of each pair was perfused immediately after death (filled symbols), while the fellow eye was perfused after enucleation and 3 hours of storage in PBS at 4°C (open symbols),

mimicking the storage conditions used in this study. The perfusion was done at room temperature (RT) with Dulbecco's PBS + 5.5 mM glucose. Both eyes were covered with moist tissue paper but otherwise exposed to RT air. The flow-pressure relationship was nearly identical in both cases, suggesting negligible post-mortem changes in outflow facility over 3 hours. Error bars are SD. Panel B: The slope of the flow-pressure relationship (outflow facility,  $C$ ) for the individual pairs comprising the data shown in Panel A. The facility values cluster around the unity line (dashes), demonstrating that facility is correlated between paired contralateral eyes within 3 hours post-mortem ( $R^2 = 0.79$ ).
