# Supplementary material
Source: PubMed Central journal article supplement (PMC4699419)
Supplement: i1552-5783-56-13-8331-s02.pdf [file i1552-5783-56-13-8331-s02.pdf]

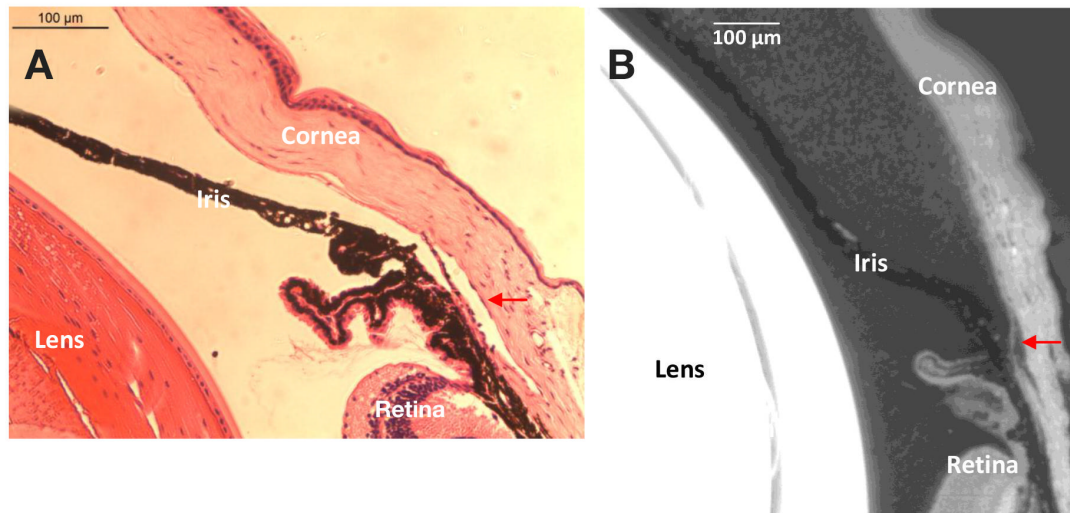

**Supplemental Figure 2:** Comparison of the iridocorneal angle imaged using conventional histology (A) compared to the automated serial section histology system (B). For conventional histology, eyes were embedded in paraffin, sectioned, and stained with hematoxylin and eosin. Red arrows indicate Schlemm's canal.
