# Supplementary material
Source: PubMed Central journal article supplement (PMC4699419)
Supplement: i1552-5783-56-13-8331-s03.pdf [file i1552-5783-56-13-8331-s03.pdf]

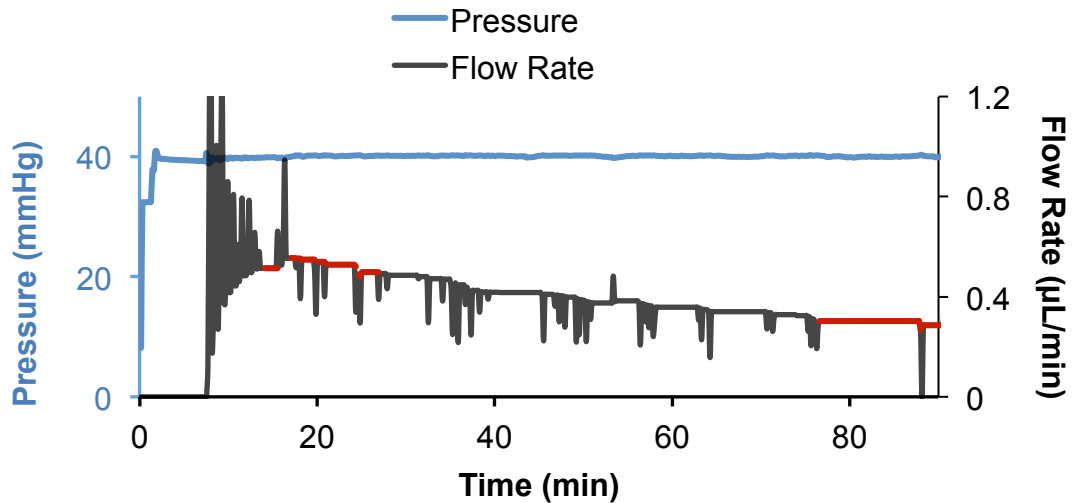

**Supplemental Figure 3:** A representative perfusion tracing of an enucleated mouse eye perfusion-fixed with 4% paraformaldehyde (PFA). The perfusion pressure (blue tracing, left axis) is maintained at 40 mmHg while the perfusion flow rate (black tracing, right axis) exhibits a decrease of ~40% that is characteristic of perfusion fixation. Red regions show the steady regions that were averaged to calculate the baseline flow rate and the flow rate after fixation. This approach was used to confirm that eyes were perfusion fixed at the desired pressure for examination of anterior chamber deepening by 3-dimensional histology.
