# Supplementary material
Source: PubMed Central journal article supplement (PMC4699419)
Supplement: i1552-5783-56-13-8331-s04.pdf [file i1552-5783-56-13-8331-s04.pdf]

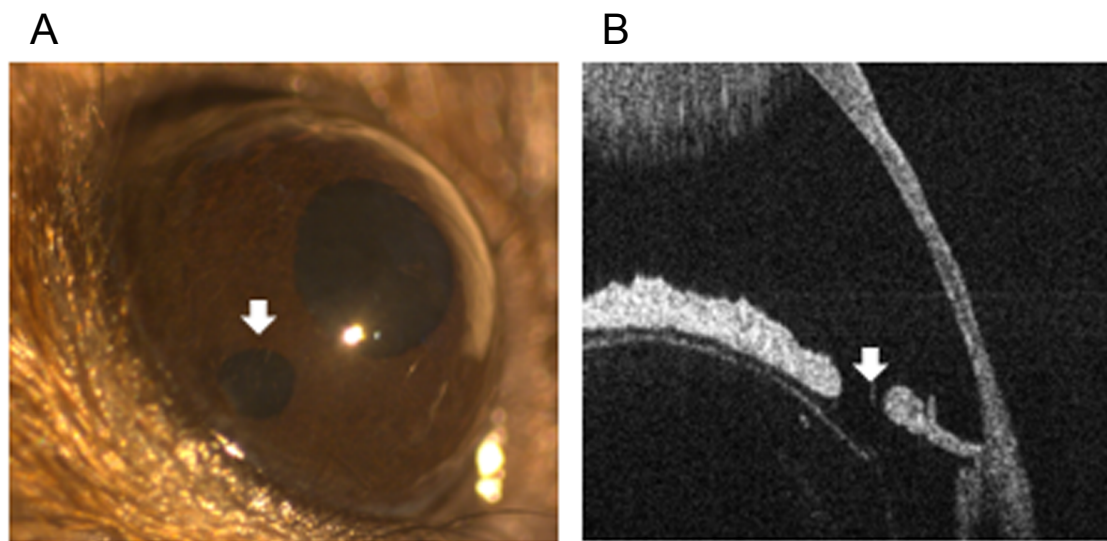

**Supplemental Figure 4:** Visualization of iridectomy in mouse eyes by light microscopy and SD-OCT. Panel A shows a frontal view of an iridectomized mouse eye taken using a stereomicroscope one week after the surgery. Panel B shows an SD-OCT B-scan of the anterior segment of same mouse eye through the iridectomy opening. Arrows indicate the location of the iridectomy opening. AC, anterior chamber.
