# Supplementary material
Source: PubMed Central journal article supplement (PMC4699419)
Supplement: i1552-5783-56-13-8331-s05.pdf [file i1552-5783-56-13-8331-s05.pdf]

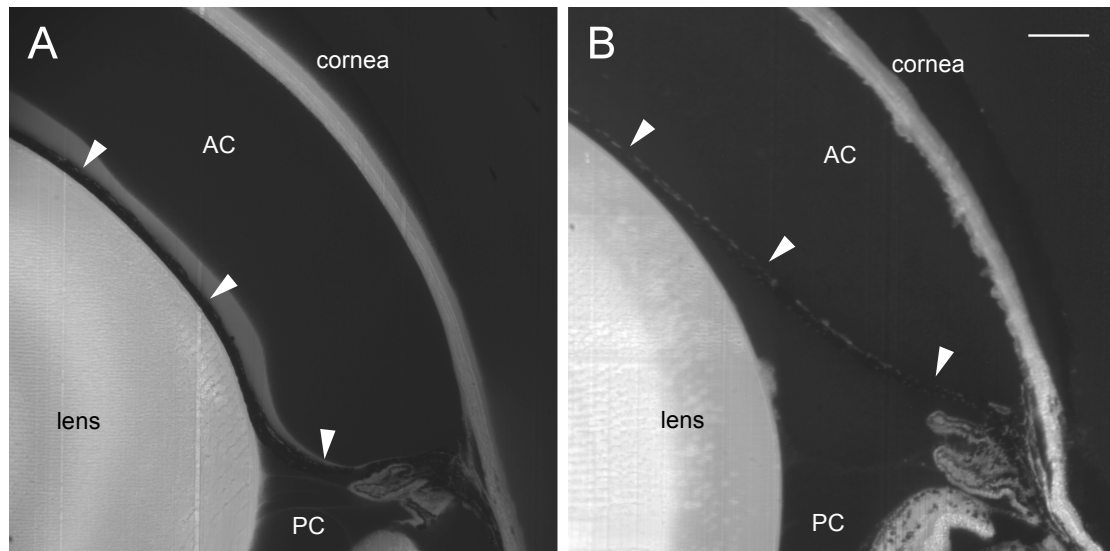

**Supplemental Figure 5:** Individual serial sections used in the generation of the three-dimensional reconstructions shown in Figure 4 of the main text. Eyes are perfused at 40 mmHg via the anterior chamber (AC, panel A) or via the posterior chamber (PC, panel B). The scale bar is 100  $\mu$ m and both images are shown at the same magnification. Arrowheads indicate the anterior surface of the iris.
